# Supplementary material
Source: ML conference proceedings conference paper supplement (https://proceedings.neurips.cc/paper_files/paper/2010/hash/71f6278d140af599e06ad9bf1ba03cb0-Abstract.html)
Supplement: Supplementary file 1 [file 71f6278d140af599e06ad9bf1ba03cb0-Supplemental.zip]

000  
001  
002  
003  
004  
005  
006  
007  
008  
009  
010  
011  
012  
013  
014  
015  
016  
017  
018  
019  
020  
021  
022  
023  
024  
025  
026  
027  
028  
029  
030  
031  
032  
033  
034  
035  
036  
037  
038  
039  
040  
041  
042  
043  
044  
045  
046  
047  
048  
049  
050  
051  
052  
053

---

# Online Learning for Latent Dirichlet Allocation: Supplementary Material

---

Anonymous Author(s)

Affiliation

Address

email

## 1 Analysis of online VB for LDA with randomized E step

In the analysis of online VB for LDA with a deterministic (but approximate) E step, we used  $g(n)$  to denote a population distribution over documents' word counts  $n$  defined by a corpus:

$$g(n) \triangleq \frac{1}{D} \sum_{d=1}^D \mathbb{I}[n = n_d]. \quad (1)$$

To analyze the case where a randomized E step is used to fit the per-document variational parameters  $\gamma$  and  $\phi$  to a document  $d$  and the variational topic parameters  $\lambda$ , we redefine  $g$  as a joint distribution over both documents and per-document parameters:

$$g(\gamma, \phi, n | \lambda) = g(\gamma, \phi | n, \lambda) g(n) = \frac{1}{D} \sum_{d=1}^D \mathbb{I}[n = n_d] g(\gamma, \phi | n, \lambda). \quad (2)$$

$g(\gamma, \phi | n, \lambda)$  is the distribution over per-document variational parameters  $\gamma$  and  $\phi$  implicitly defined by the randomized algorithm for fitting  $\gamma$  and  $\phi$  given a document's word count vector  $n$  and the top-level variational parameters  $\lambda$ .  $g(n)$  is the population distribution, as before. We sample from  $g(\gamma, \phi, n | \lambda)$  by choosing a document  $d$  at random from the corpus, and then using a randomized E step to fit  $\gamma_d$  and  $\phi_d$  given  $n_d$  and  $\lambda$ .

Our goal is now to find a setting of  $\lambda$  that optimizes the objective

$$\mathcal{L}(g, \lambda) \triangleq D \mathbb{E}_g[\ell(n, \gamma, \phi, \lambda) | \lambda]. \quad (3)$$

Optimizing this objective means finding a setting of  $\lambda$  that gives us as high an *expected* value of the ELBO  $\mathcal{L}$  as possible after running our randomized E step. Deterministic optimization of this objective is impossible. We cannot assume an analytic form for  $g(\gamma, \phi | n, \lambda)$ , and so we cannot even compute this objective. We can nonetheless optimize it using stochastic gradient.

If  $n_t, \gamma_t, \phi_t \sim g$ , then

$$\mathbb{E}_g[\nabla_{\lambda} D \ell(n_t, \gamma_t, \phi_t, \lambda) | \lambda] = \nabla_{\lambda} D \mathbb{E}_g[\ell(n, \gamma, \phi, \lambda) | \lambda] = \nabla_{\lambda} \mathcal{L}(g, \lambda). \quad (4)$$

That is, the expected value of the gradient of the per-document objective is equal to the gradient of the objective  $\mathcal{L}$ , satisfying a critical condition for convergence [1]. This differs from the usual stochastic gradient setup in that we cannot directly compute the objective we are optimizing, but are instead trying to find a stationary point of an *expected* objective. Since  $\ell(n, \gamma, \phi, \lambda)$  is thrice differentiable with respect to  $\lambda$ , its expectation is as well, satisfying the first assumption in section 5 of [1]. (This is true even though we cannot compute the expectation or its derivatives.) It can be easily verified that the other conditions for general online optimization outlined in [1] are satisfied.

## 2 Supplemental learning parameter evaluation figures

Below are three plots summarizing the held-out perplexities obtained by our online VB algorithm on sets of Wikipedia and *Nature* articles for every setting of the learning parameters  $\kappa$  (learning rate),  $\tau_0$  (downweighting of the initial iterations) and  $S$  (mini-batch size) that we evaluated.

054  
 055  
 056  
 057  
 058  
 059  
 060  
 061  
 062  
 063  
 064  
 065  
 066  
 067  
 068  
 069  
 070  
 071  
 072  
 073  
 074  
 075  
 076  
 077  
 078  
 079  
 080  
 081  
 082  
 083  
 084  
 085  
 086  
 087  
 088  
 089  
 090  
 091  
 092  
 093  
 094  
 095  
 096  
 097  
 098  
 099  
 100  
 101  
 102  
 103  
 104  
 105  
 106  
 107

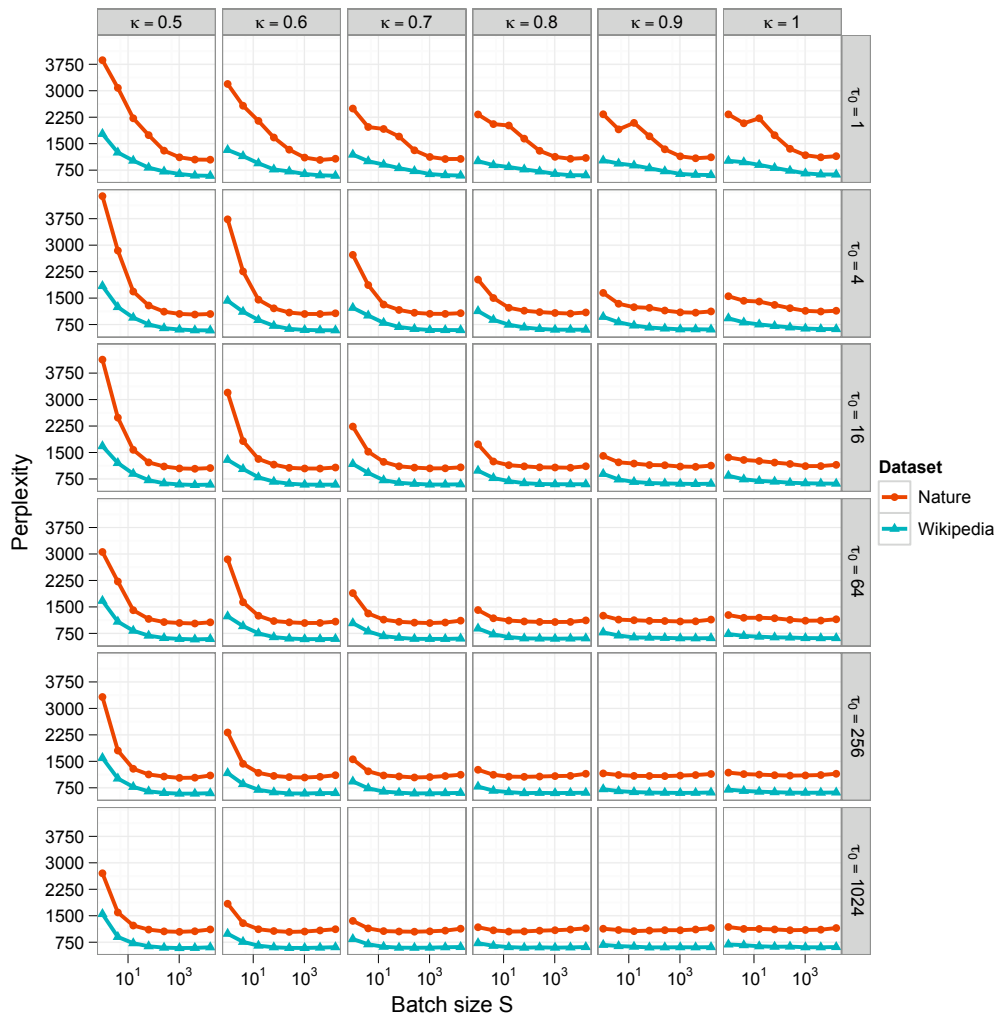

Figure 1: Held-out perplexity obtained on the *Nature* and Wikipedia corpora for various settings of the learning rate  $\kappa$ , mini-batch size  $S$ , and initial slowdown parameter  $\tau_0$ , presented as a function of mini-batch size  $S$ .

108  
 109  
 110  
 111  
 112  
 113  
 114  
 115  
 116  
 117  
 118  
 119  
 120  
 121  
 122  
 123  
 124  
 125  
 126  
 127  
 128  
 129  
 130  
 131  
 132  
 133  
 134  
 135  
 136  
 137  
 138  
 139  
 140  
 141  
 142  
 143  
 144  
 145  
 146  
 147  
 148  
 149  
 150  
 151  
 152  
 153  
 154  
 155  
 156  
 157  
 158  
 159  
 160  
 161

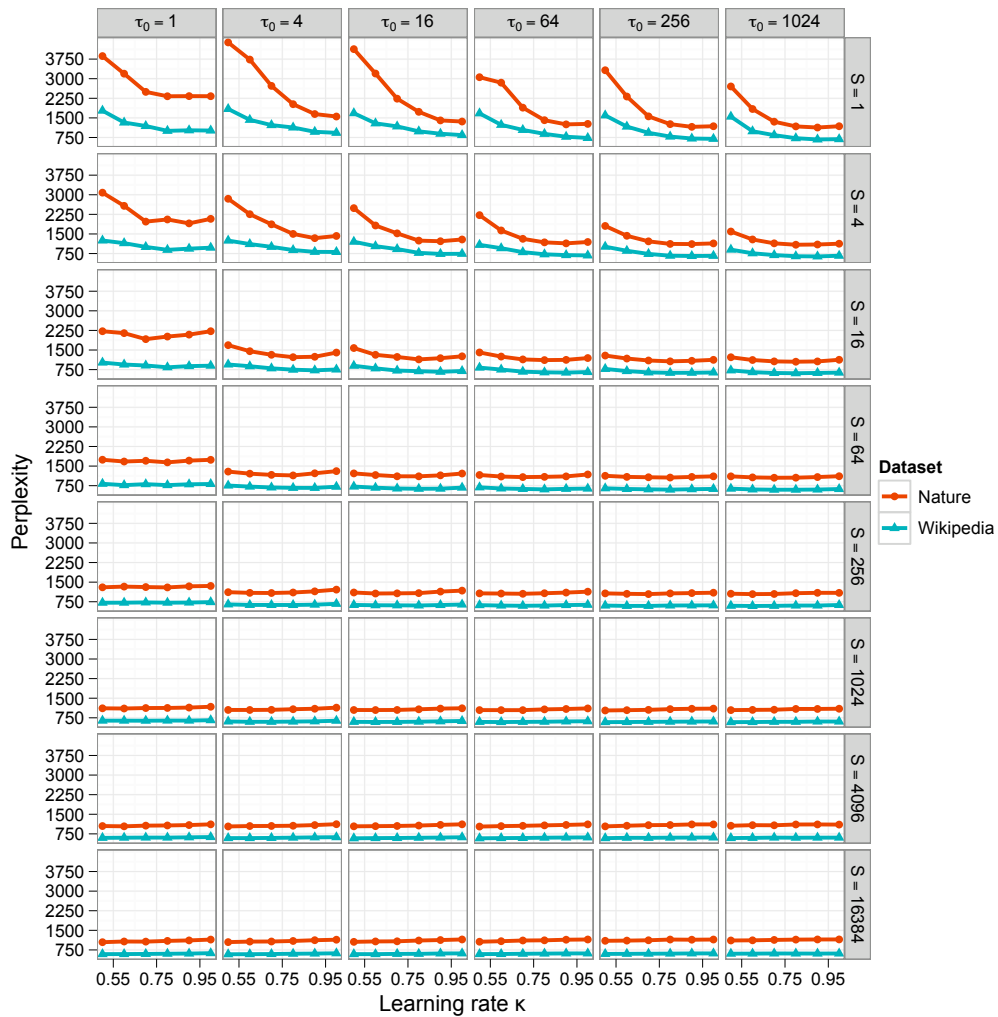

Figure 2: Held-out perplexity obtained on the *Nature* and *Wikipedia* corpora for various settings of the learning rate  $\kappa$ , mini-batch size  $S$ , and initial slowdown parameter  $\tau_0$ , presented as a function of learning rate  $\kappa$ .

162  
 163  
 164  
 165  
 166  
 167  
 168  
 169  
 170  
 171  
 172  
 173  
 174  
 175  
 176  
 177  
 178  
 179  
 180  
 181  
 182  
 183  
 184  
 185  
 186  
 187  
 188  
 189  
 190  
 191  
 192  
 193  
 194  
 195  
 196  
 197  
 198  
 199  
 200  
 201  
 202  
 203  
 204  
 205  
 206  
 207  
 208  
 209  
 210  
 211  
 212  
 213  
 214  
 215

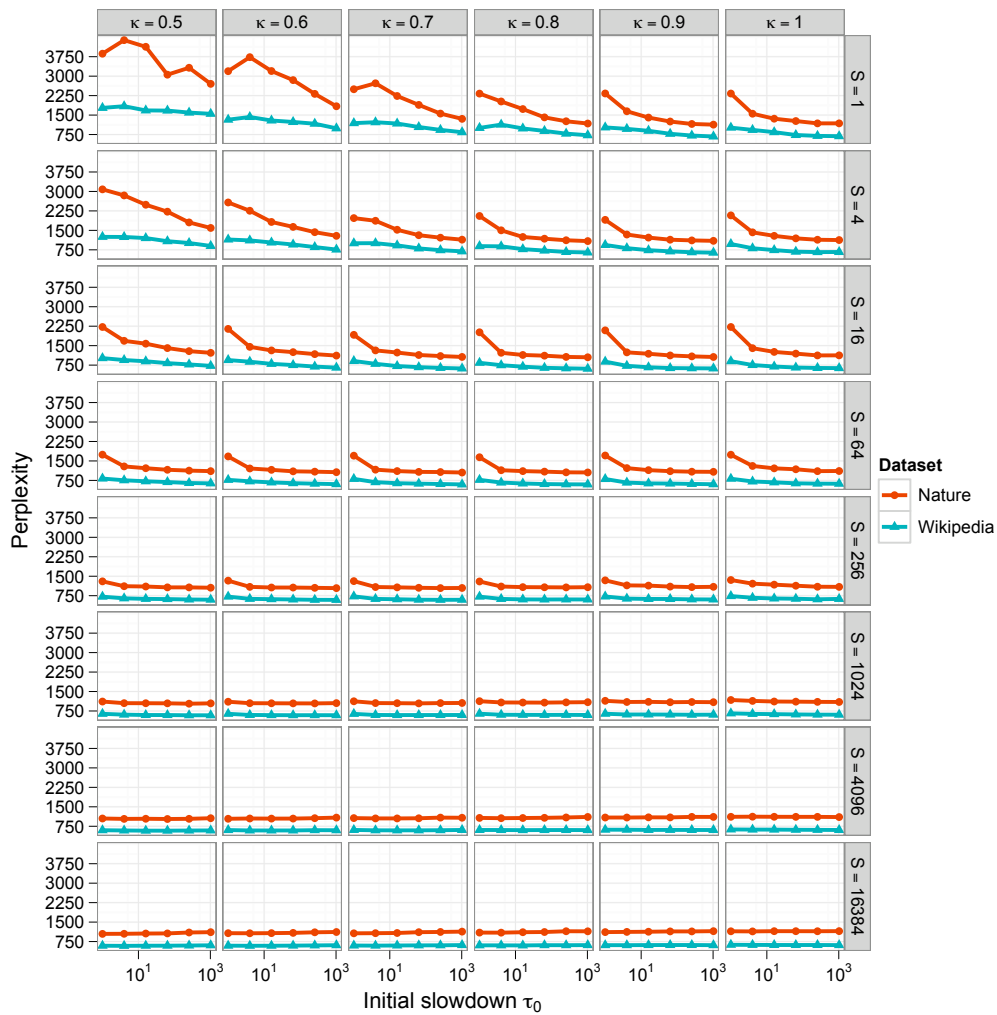

Figure 3: Held-out perplexity obtained on the *Nature* and Wikipedia corpora for various settings of the learning rate  $\kappa$ , mini-batch size  $S$ , and initial slowdown parameter  $\tau_0$ , presented as a function of initial slowdown  $\tau_0$ .

216  
217  
218  
219  
220  
221  
222  
223  
224  
225  
226  
227  
228  
229  
230  
231  
232  
233  
234  
235  
236  
237  
238  
239  
240  
241  
242  
243  
244  
245  
246  
247  
248  
249  
250  
251  
252  
253  
254  
255  
256  
257  
258  
259  
260  
261  
262  
263  
264  
265  
266  
267  
268  
269

## References

- [1] L. Bottou. *Online learning and stochastic approximations*. Cambridge University Press, Cambridge, UK, 1998.
